# Supplementary material for: Mutational Analysis of SARS-CoV-2 Genome in African Population
Source: bioRxiv or medRxiv preprint supplement (doi:10.1101/2020.09.07.286088), 2020-09-07

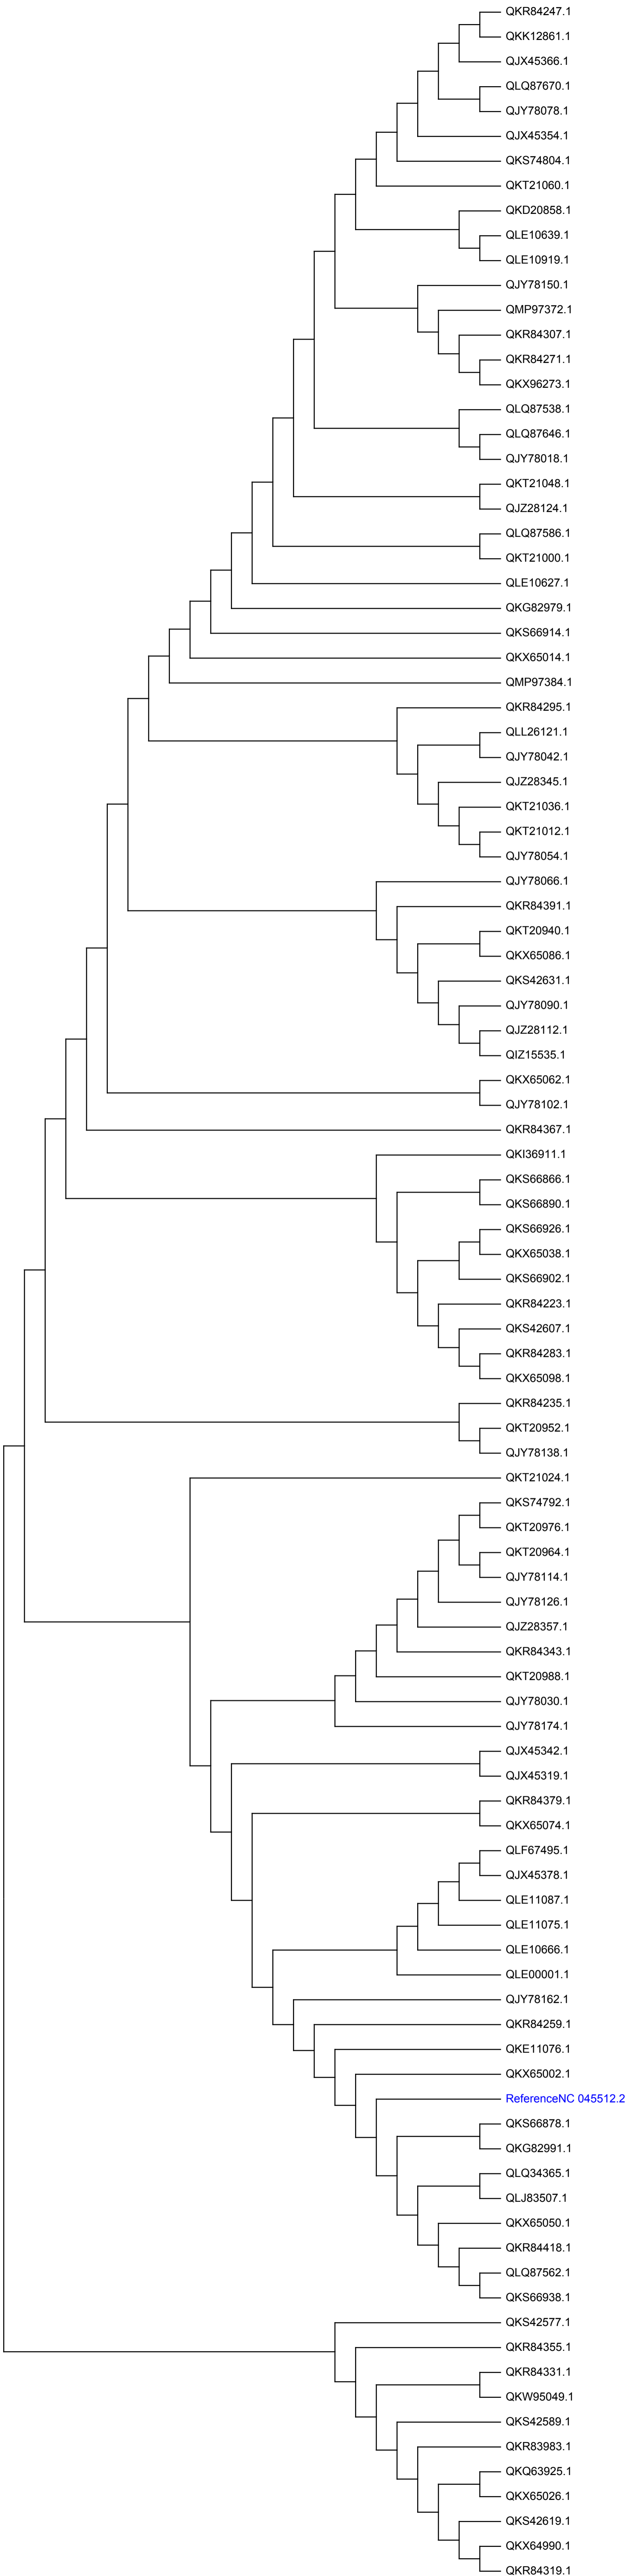

Supplement: Supplementary file [file media-1.pdf]
